# Supplementary material
Source: publisher site journal article supplement (https://www.kjim.org/upload/media/kjim-2024-314-supplementary-fig-1.pdf)
Supplement: Supplementary file 1 [file kjim-2024-314-supplementary-fig-1.pdf]

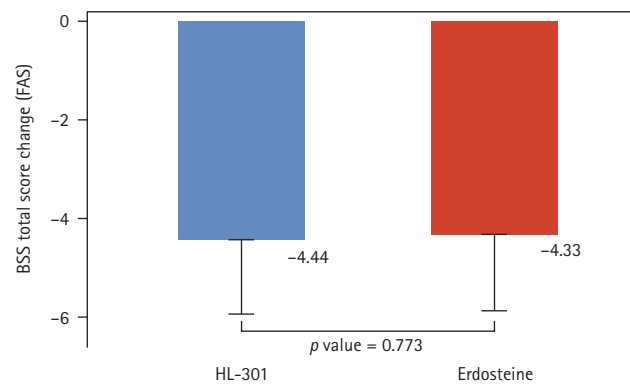

**Supplementary Figure 1.** Total BSS change (FAS). BSS, Bronchitis Severity Score; FAS, full analysis set.
